# Supplementary material for: Collagenase Clostridium Histolyticum-aaes for Treatment of Cellulite: A Pooled Analysis of Two Phase-3 Trials
Source: PubMed Central journal article supplement — Plast Reconstr Surg Glob Open. 2022 May 25;10(5):e4306. doi: 10.1097/GOX.0000000000004306 (PMC9132528; doi:10.1097/gox.0000000000004306), 2022-05-25

## Patient Reported Photonumeric Cellulite Severity Scale (PR-PCSS) – Buttock

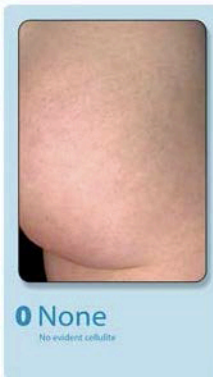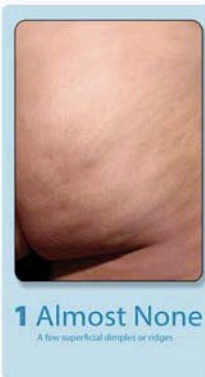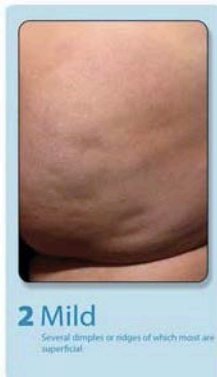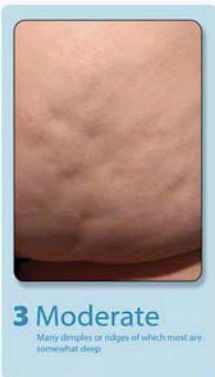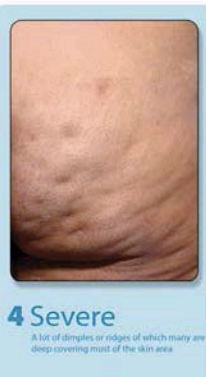

## Clinician Reported Photonumeric Cellulite Severity Scale (CR-PCSS) – Buttock

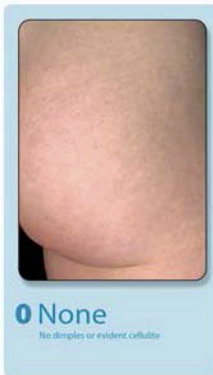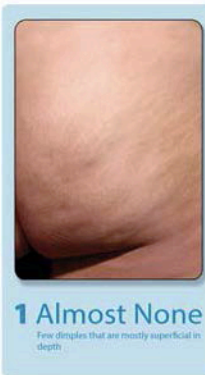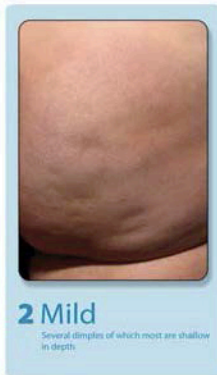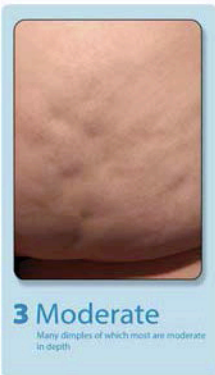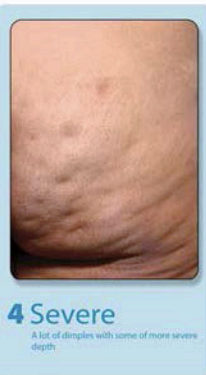

Supplement: gox-10-e4306-s004.pdf [file gox-10-e4306-s004.pdf]
