# Supplementary figures and images for: Collagenase Clostridium Histolyticum-aaes for Treatment of Cellulite: A Pooled Analysis of Two Phase-3 Trials
Source: PubMed Central journal article supplement — Plast Reconstr Surg Glob Open. 2022 May 25;10(5):e4306. doi: 10.1097/GOX.0000000000004306 (PMC9132528; doi:10.1097/gox.0000000000004306), 2022-05-25

**Pre-Treatment**

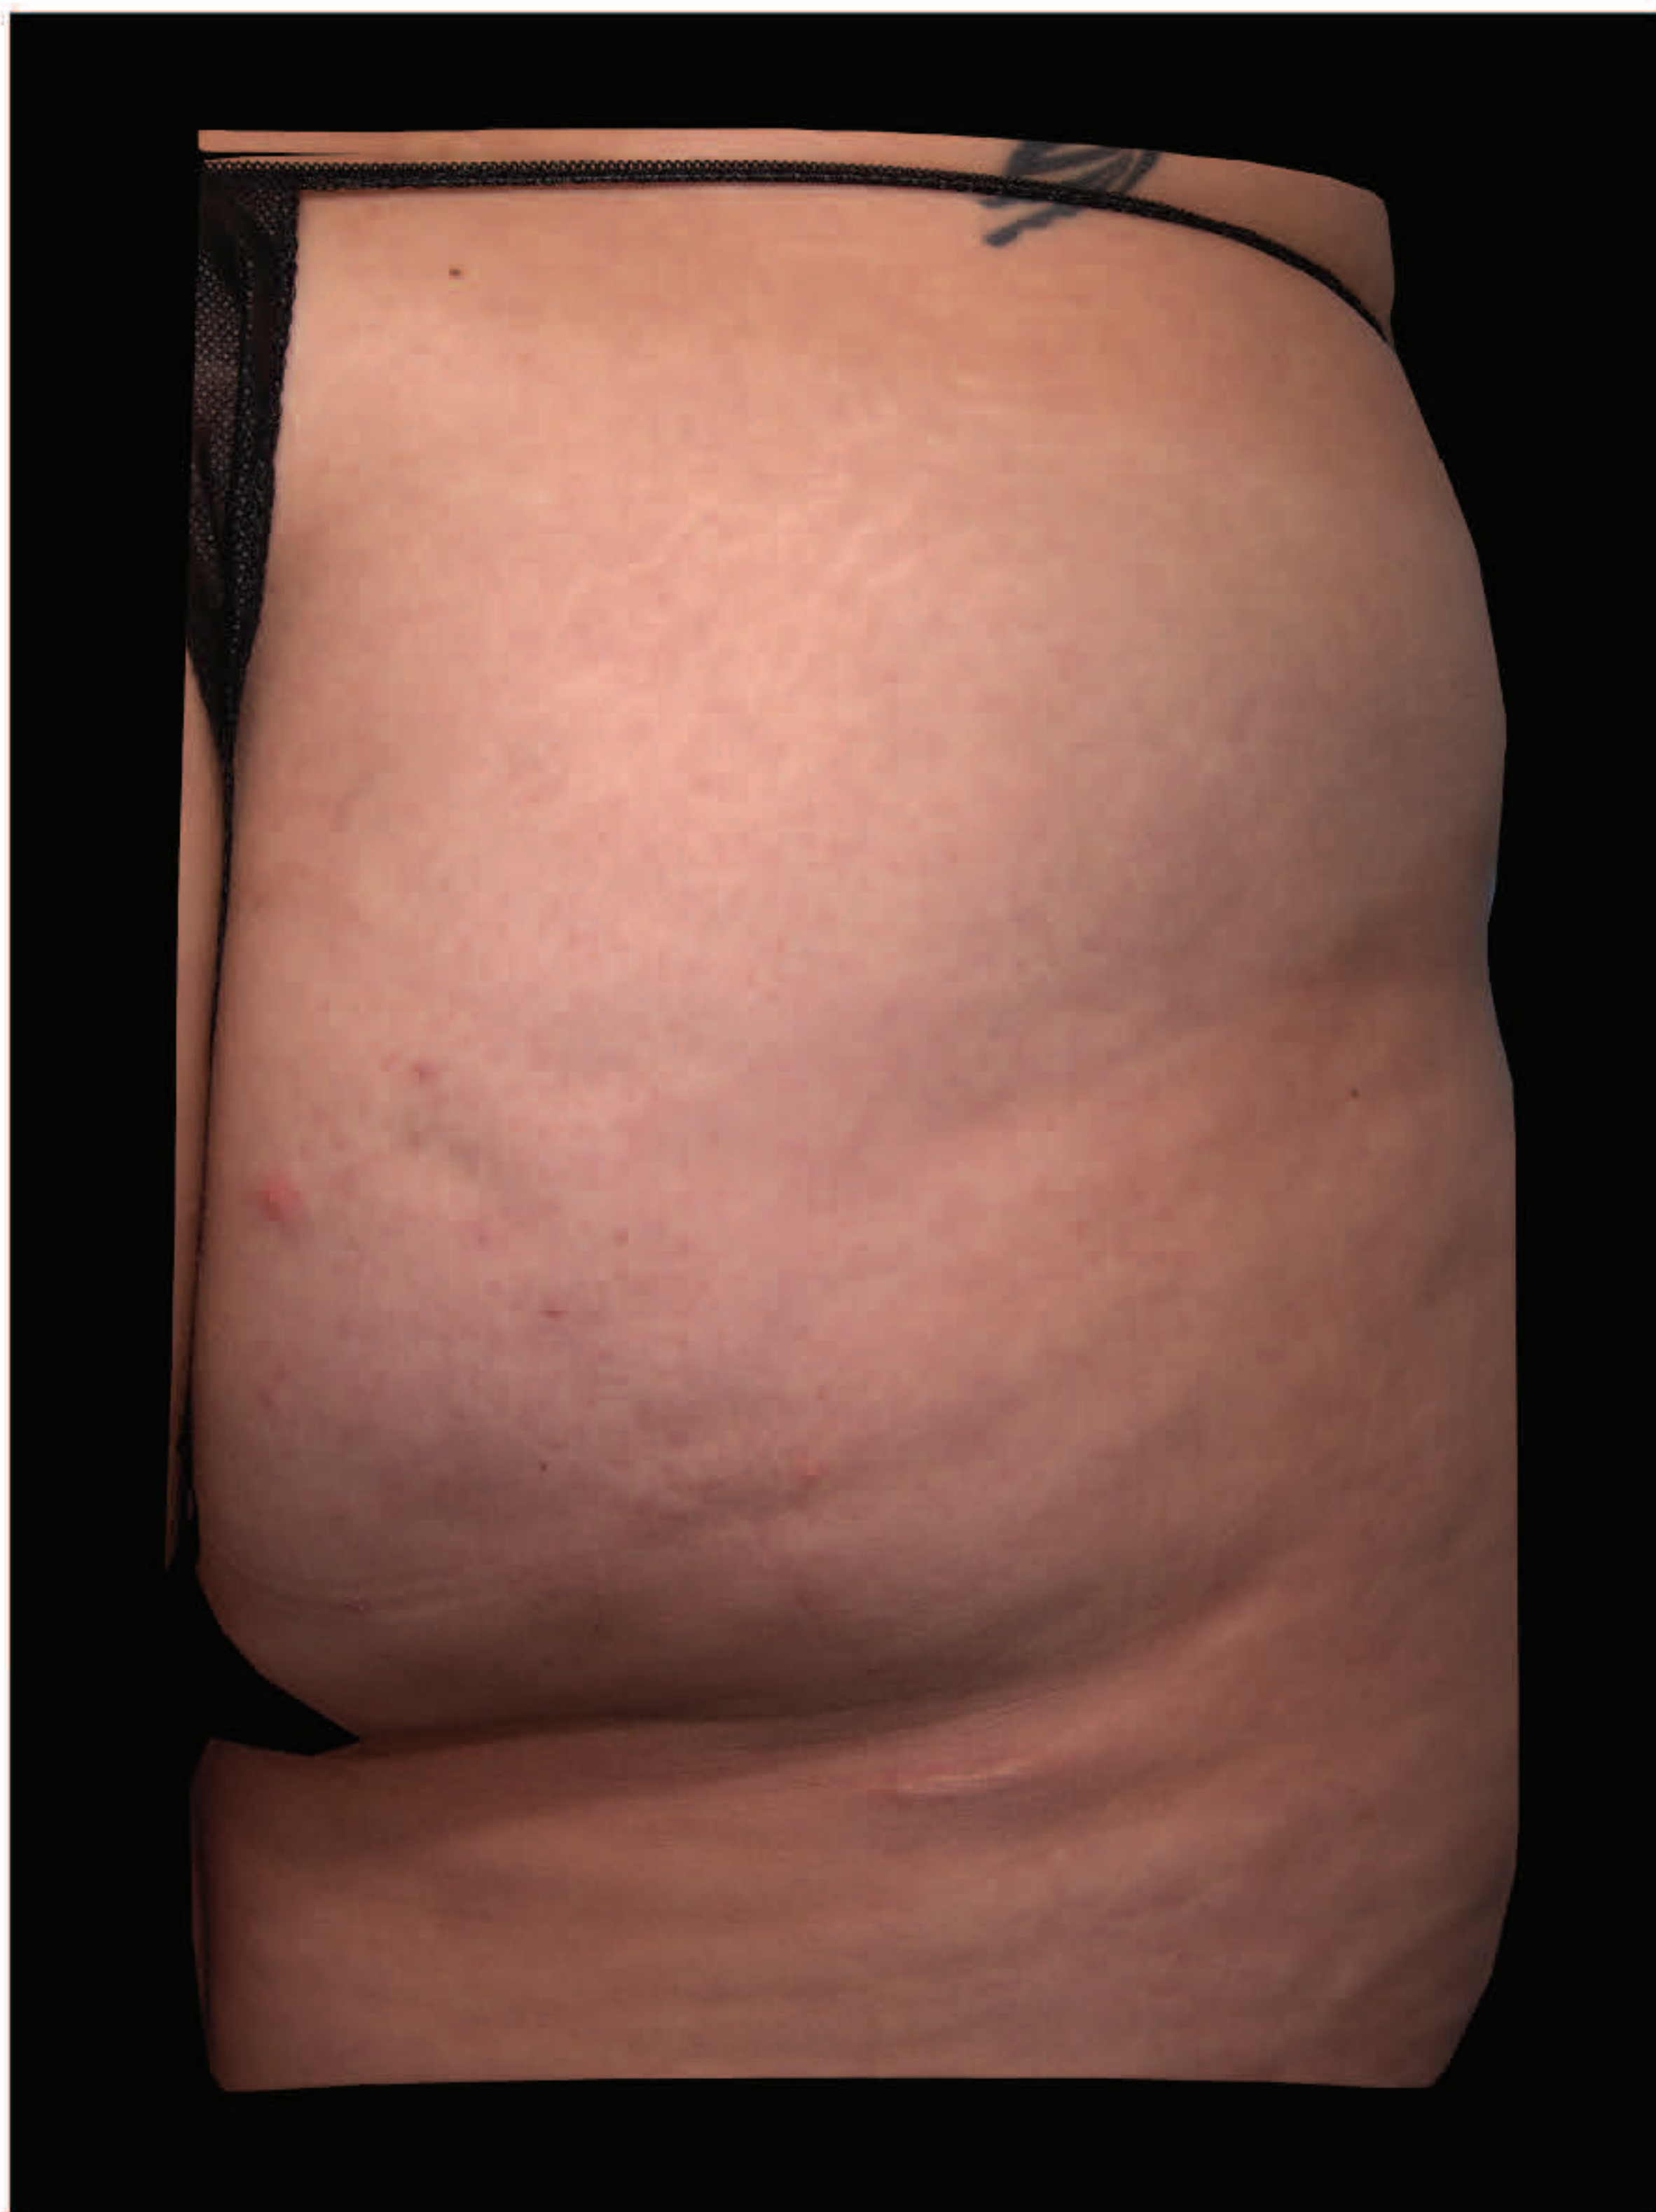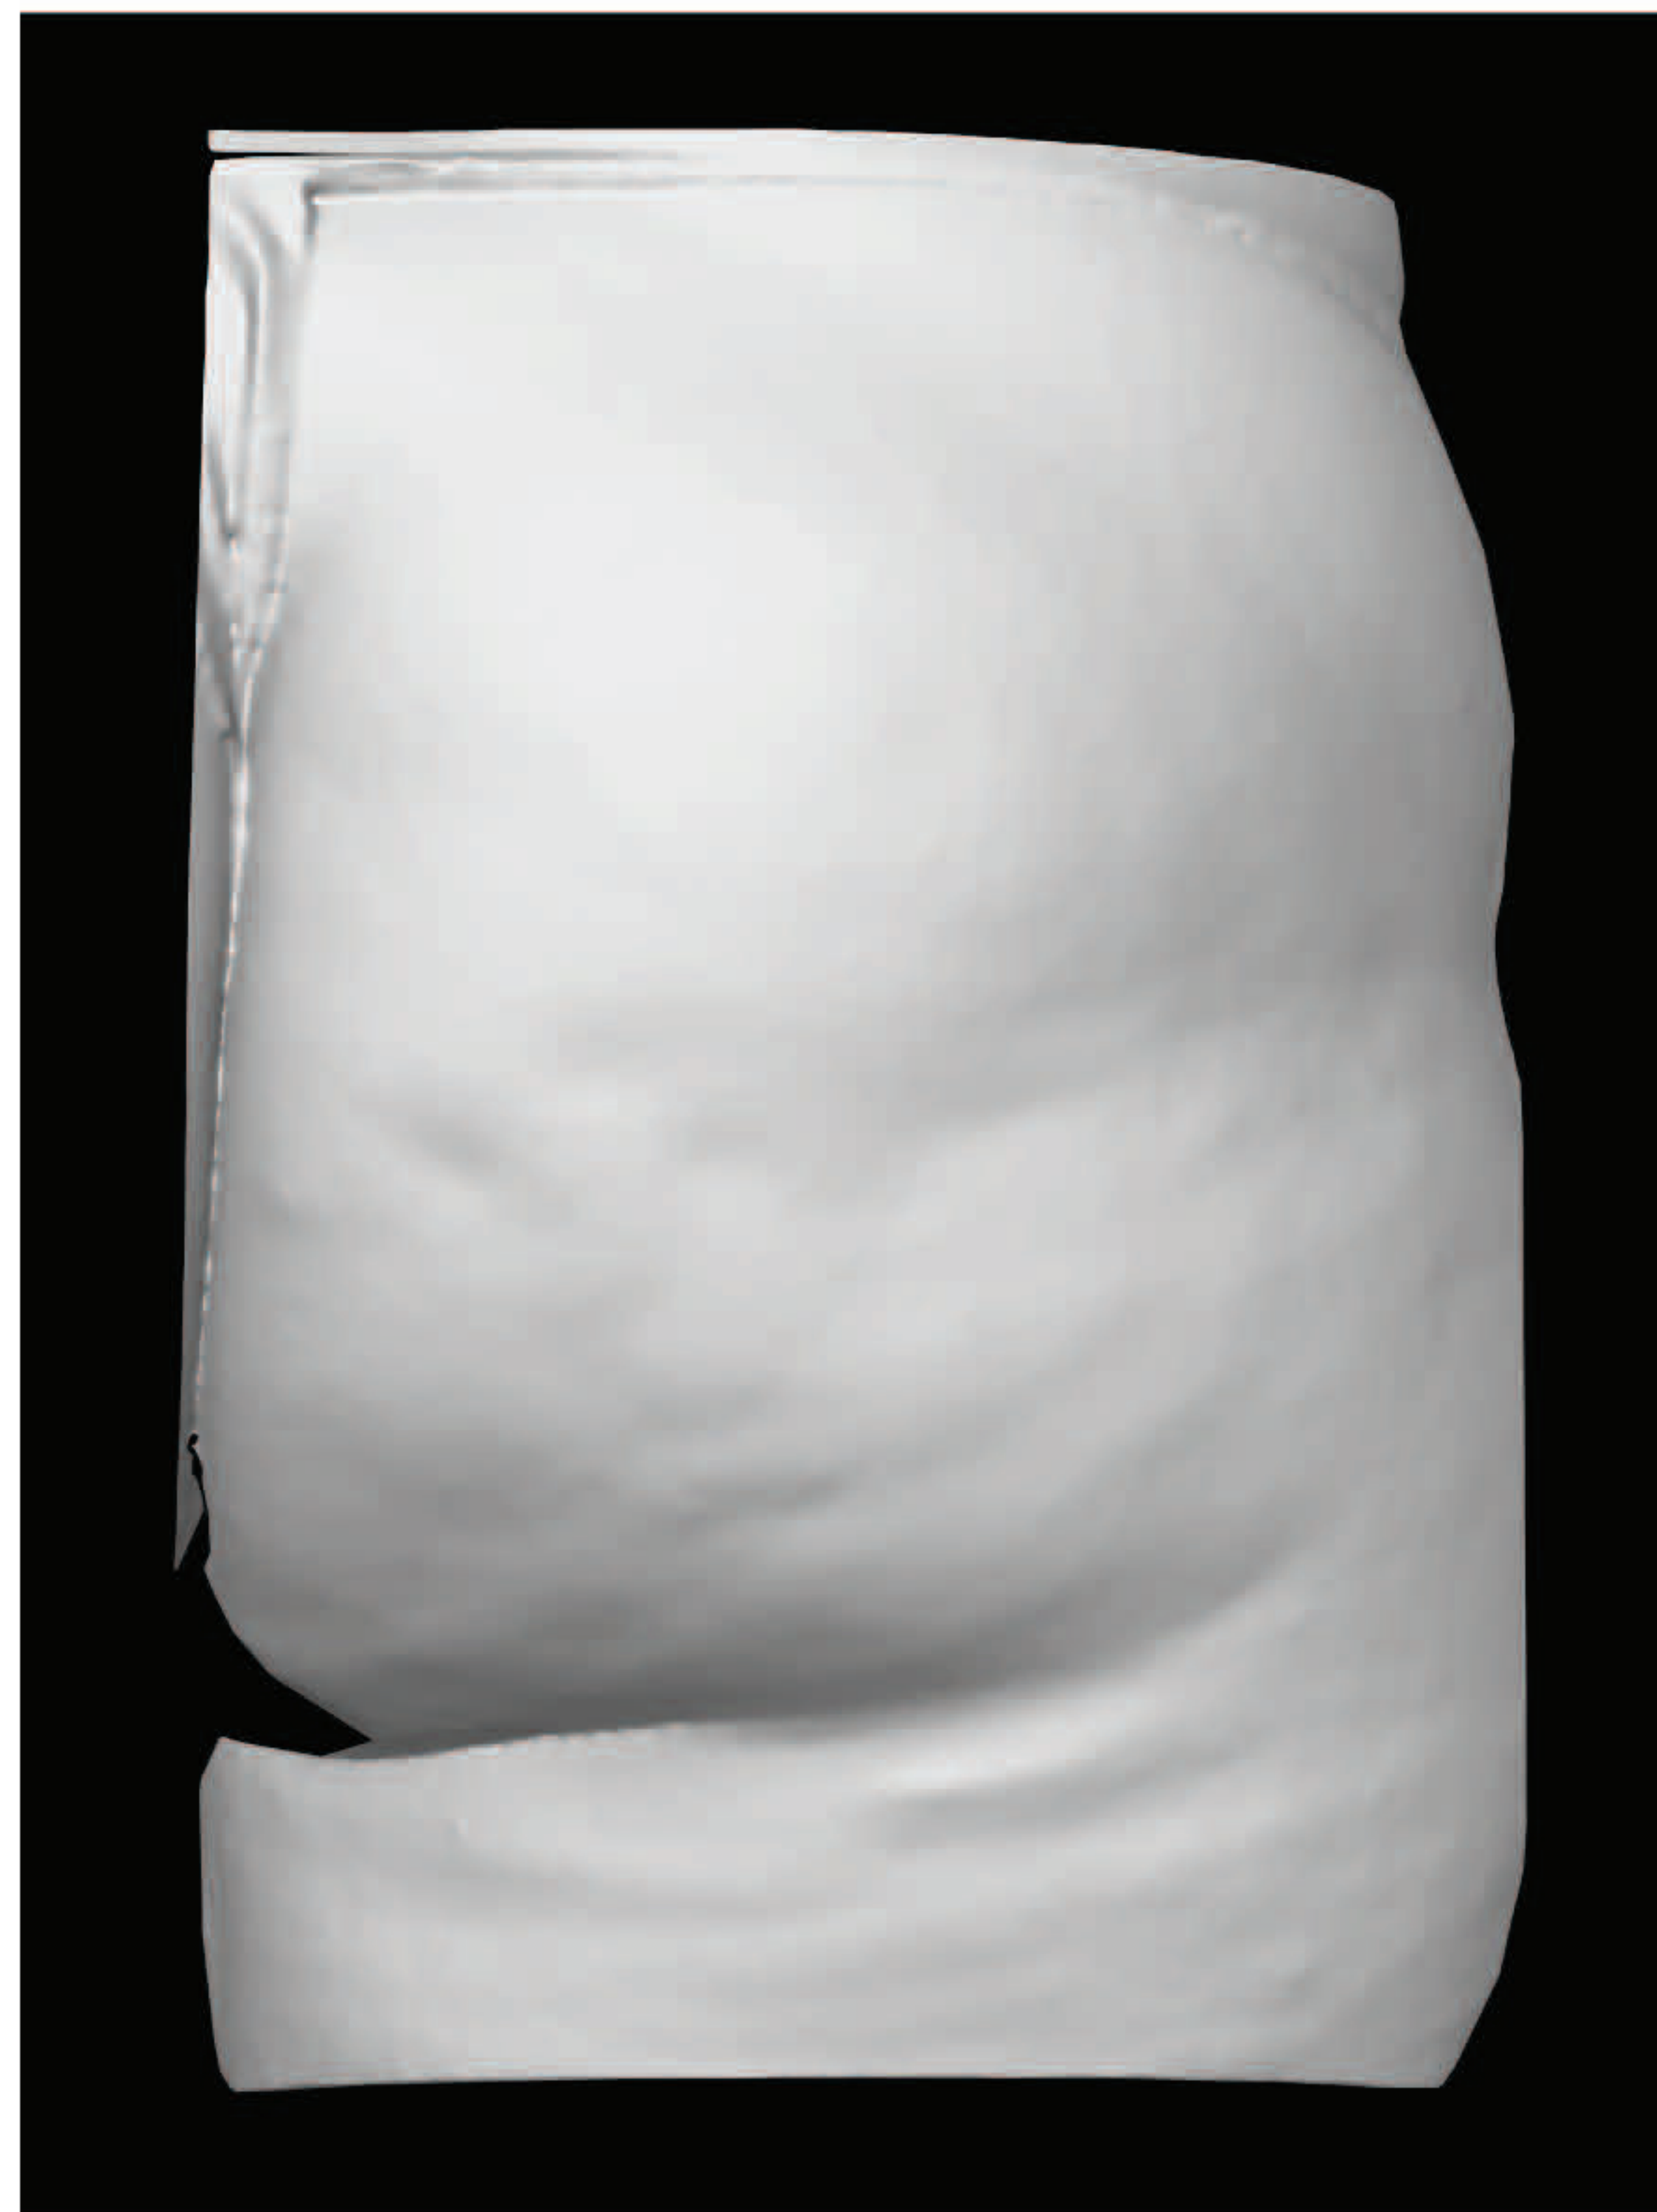

**Day 71†**

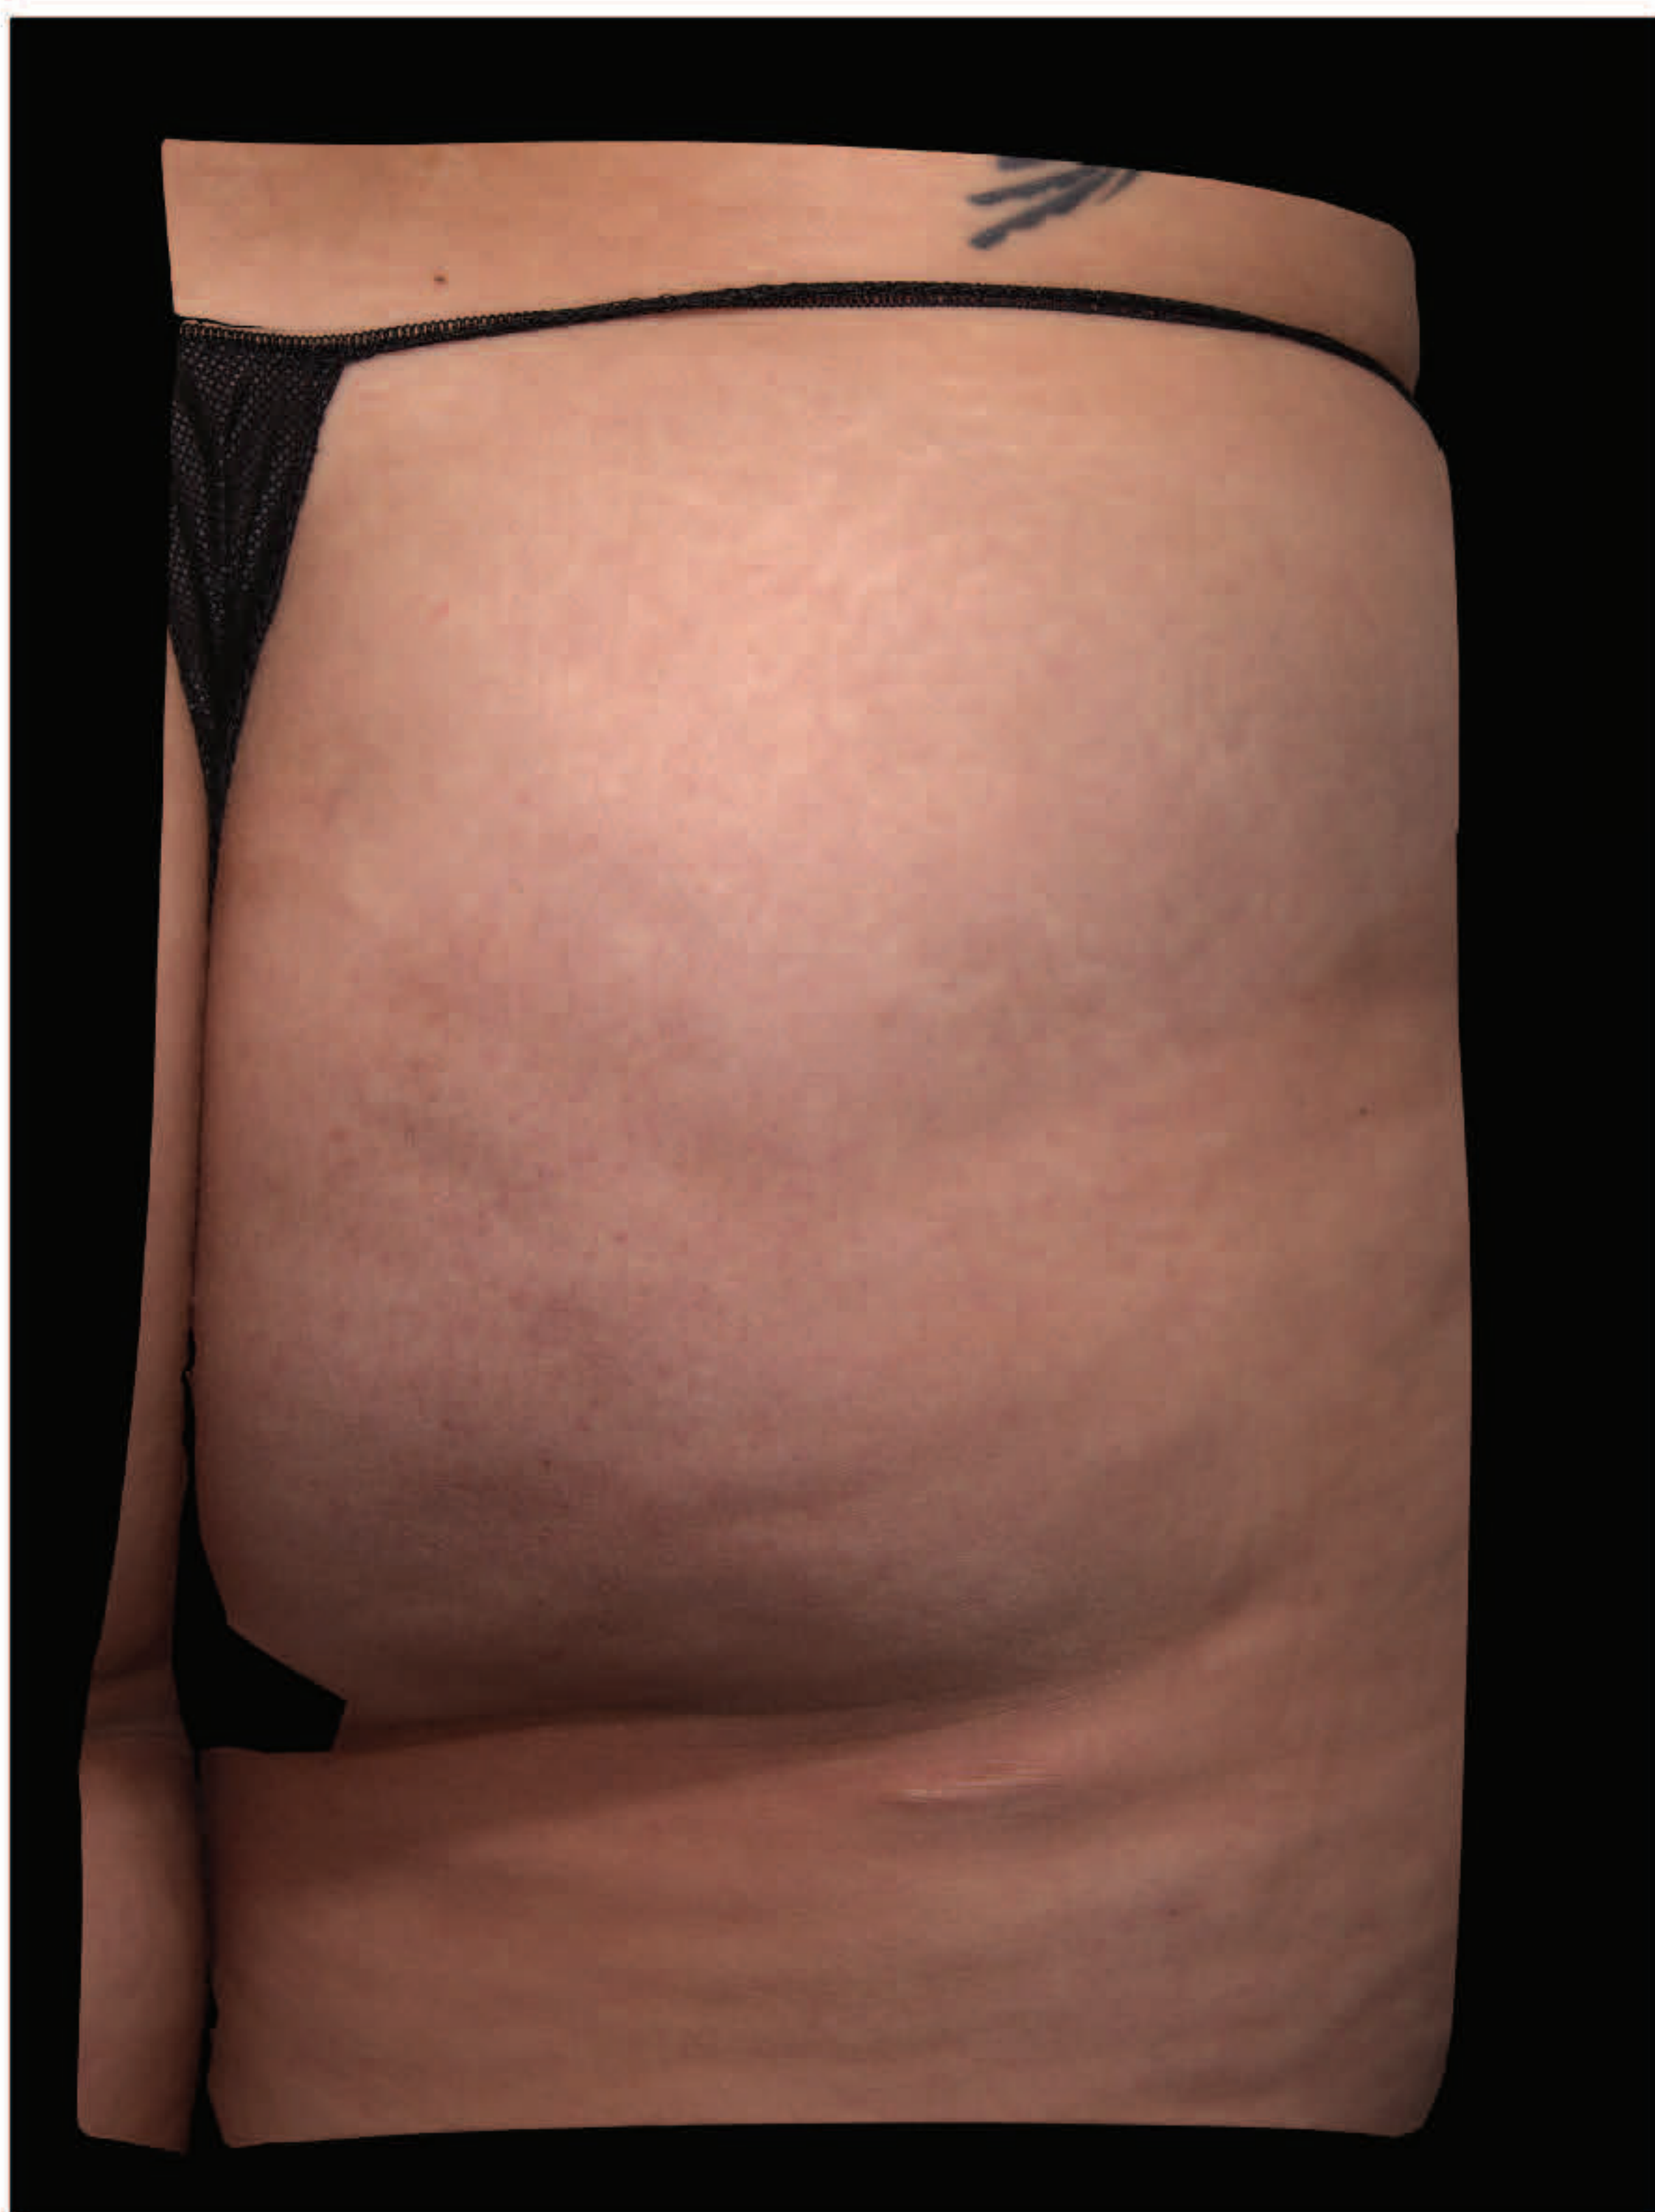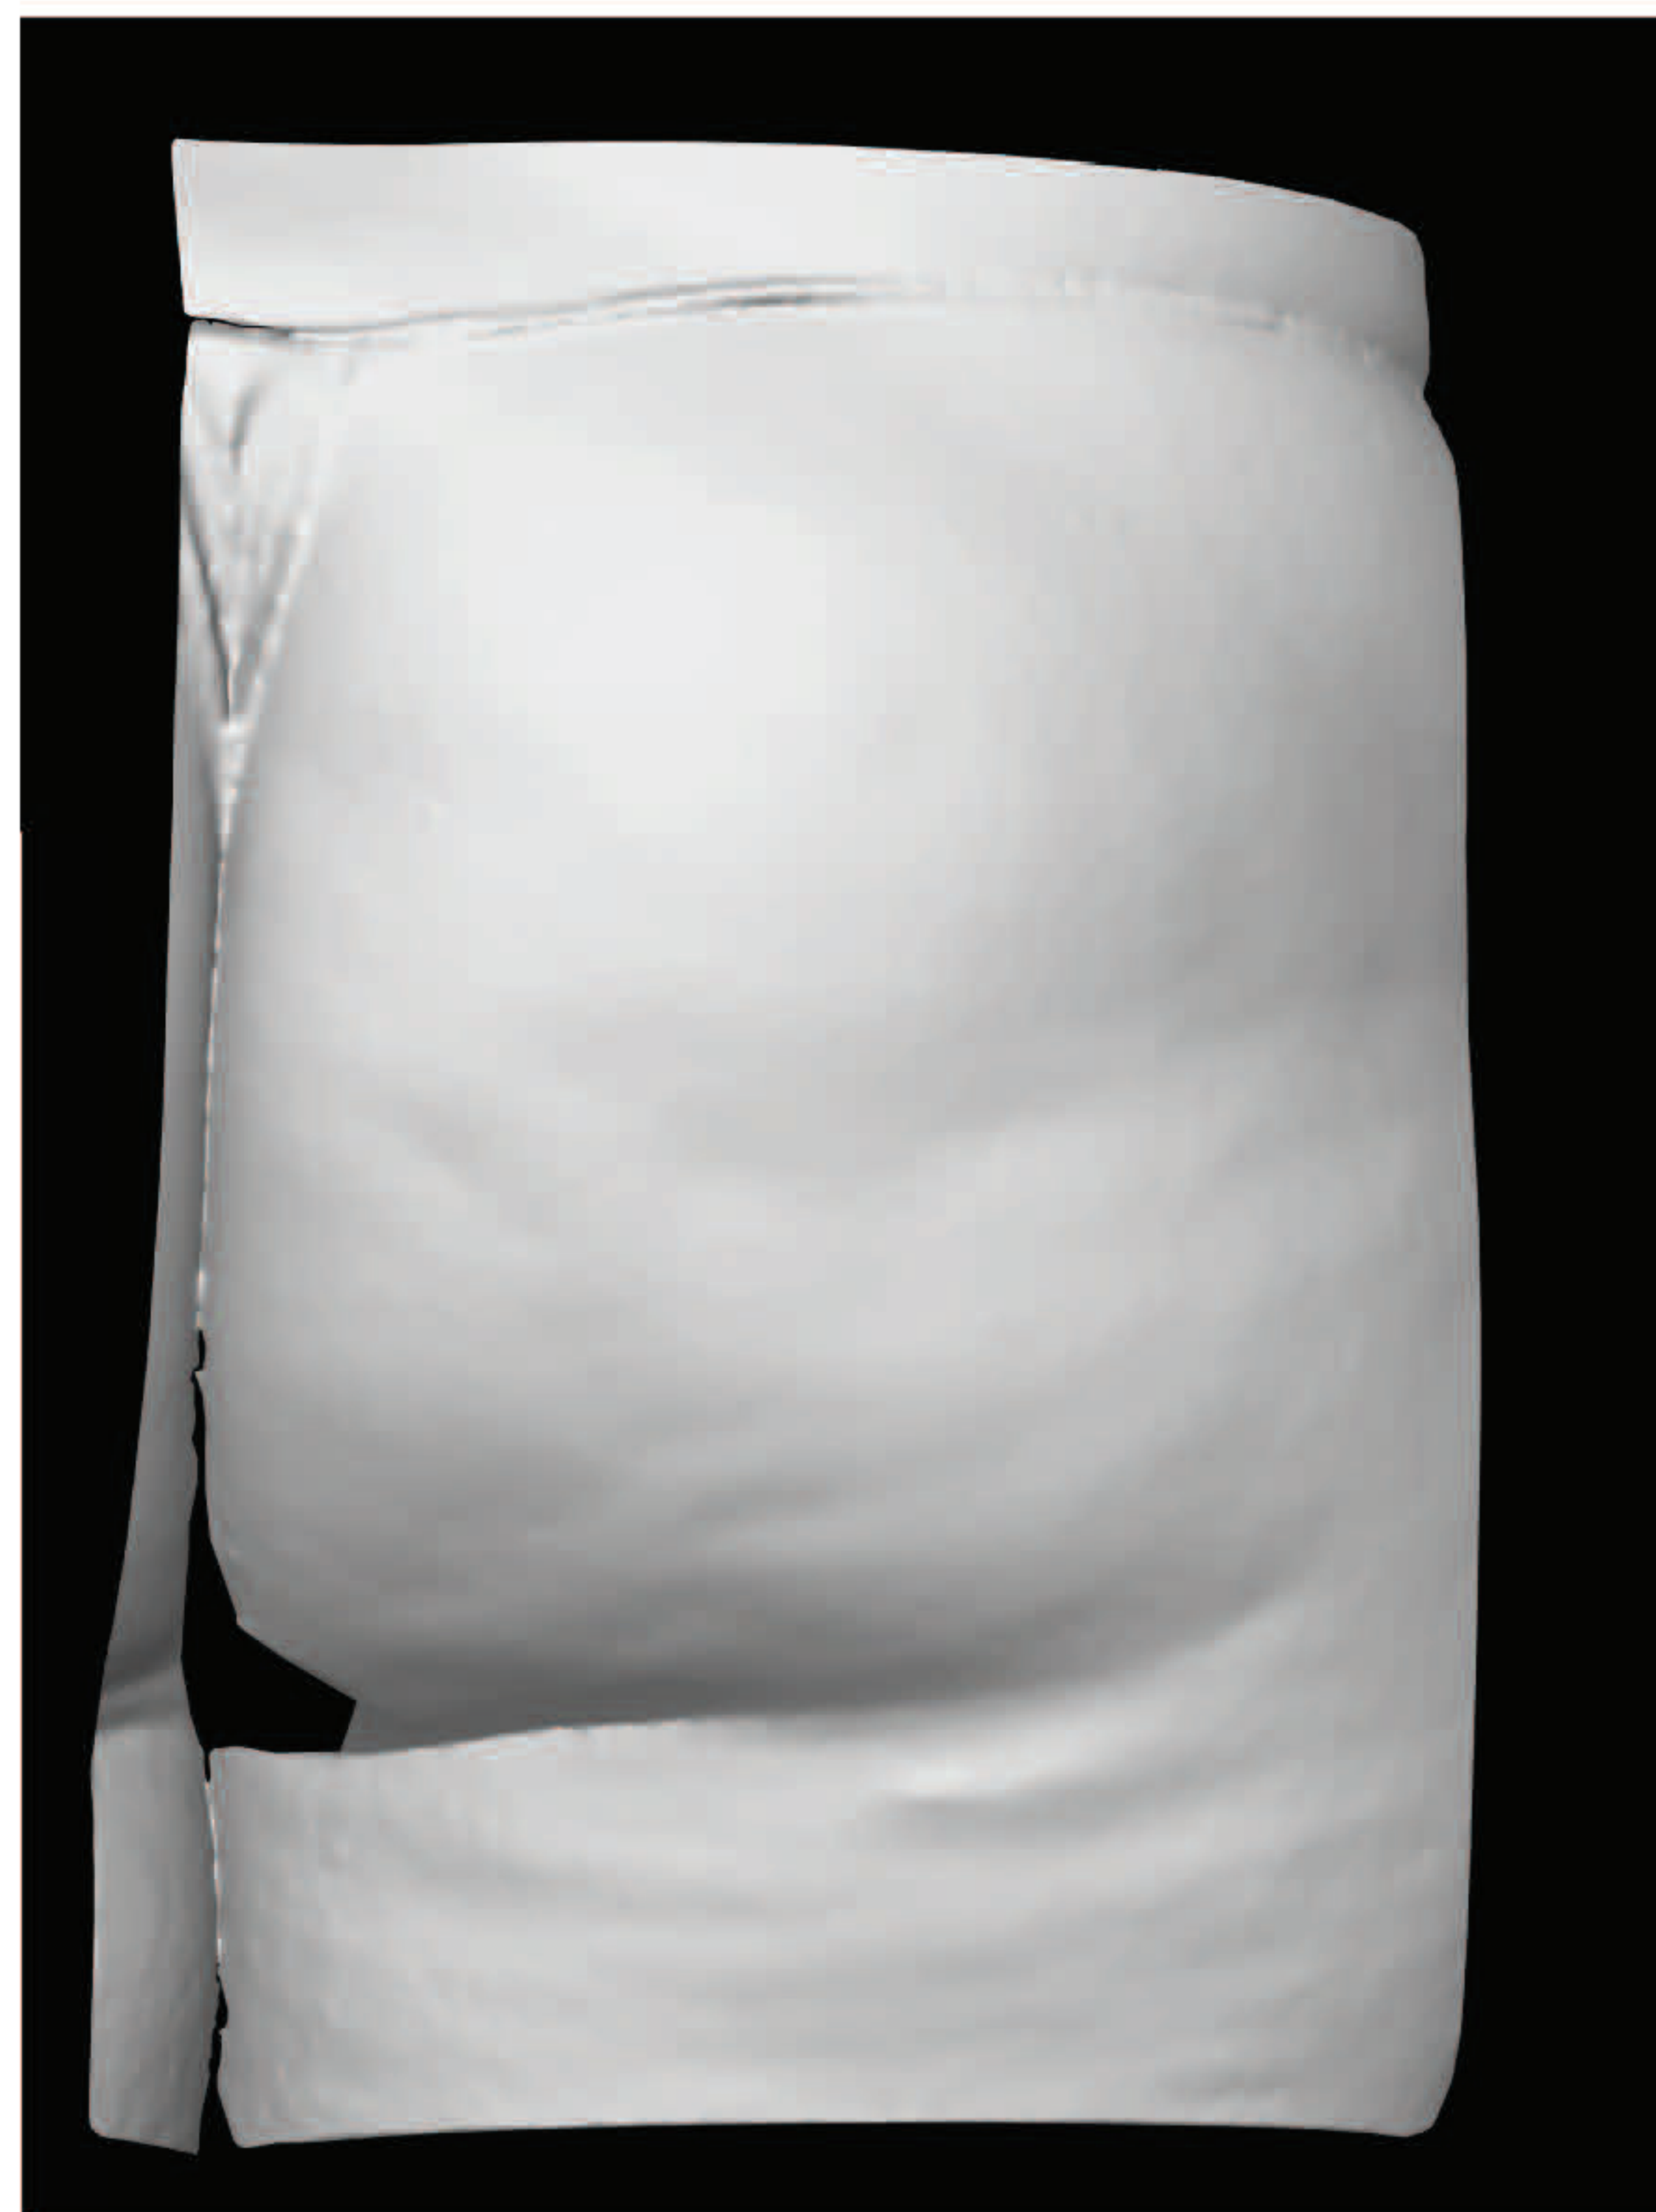

Supplement: gox-10-e4306-s005.pdf [file gox-10-e4306-s005.pdf]

**Pre-Treatment**

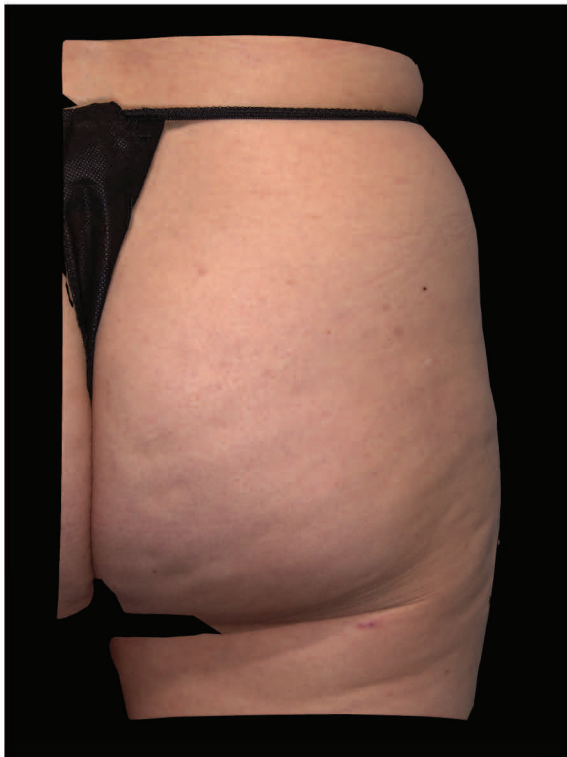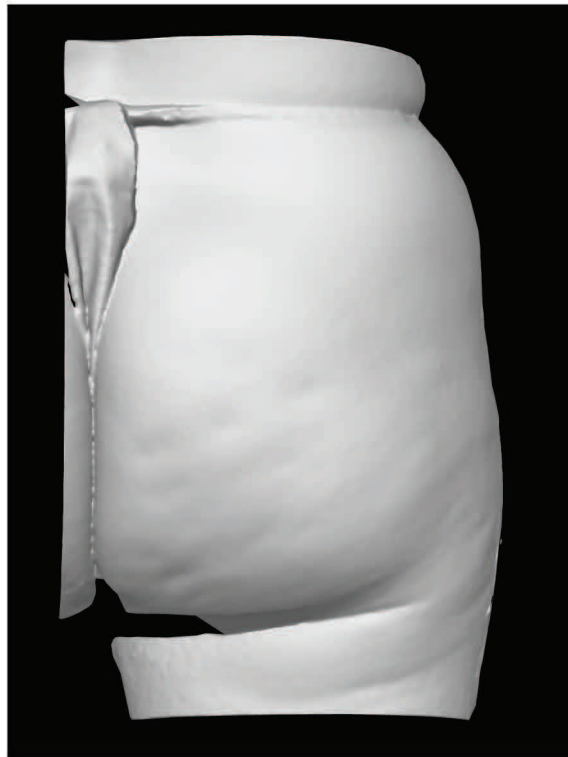

**Day 71†**

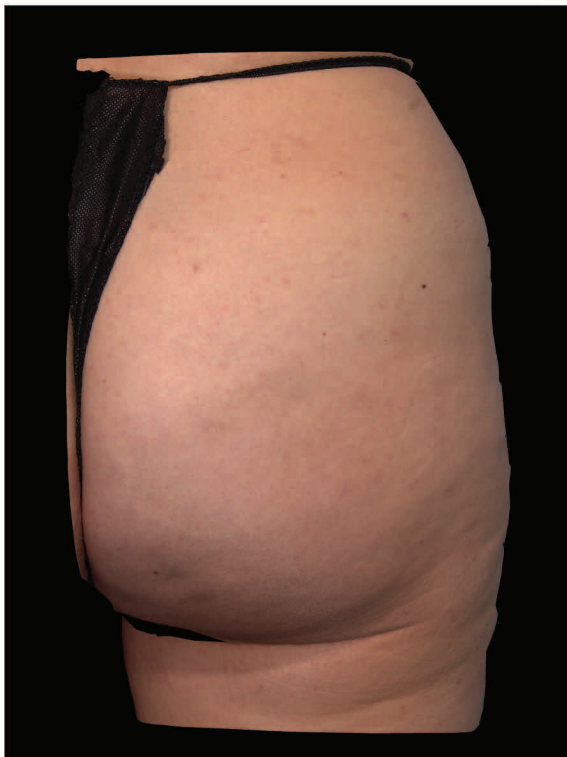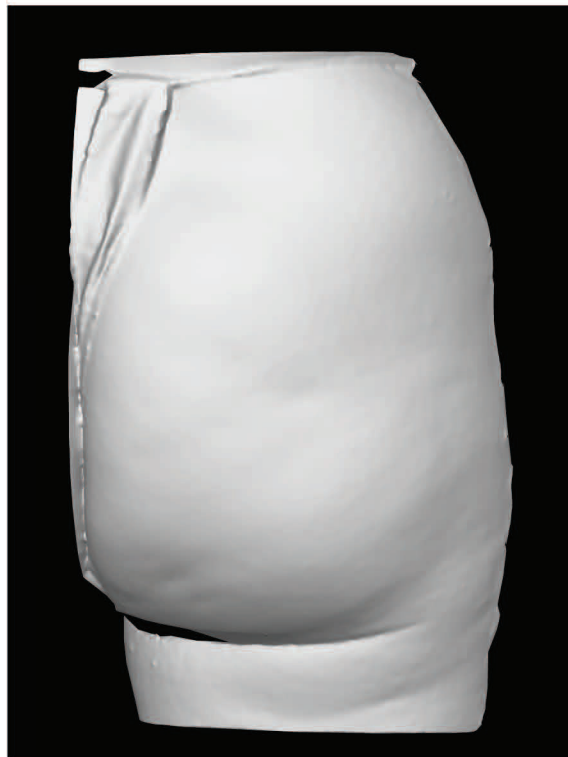

Supplement: gox-10-e4306-s006.pdf [file gox-10-e4306-s006.pdf]
